# Supplementary material for: Eps15 Homology Domain-Containing Protein 3 Hypermethylation as a Prognostic and Predictive Marker for Colorectal Cancer
Source: MDPI journal article supplement (doi:10.3390/biomedicines9050453), 2021-04-22
Supplement: s1 [file s1]

## Article

# Eps15 Homology Domain-Containing Protein 3 Hypermethylation as a Prognostic and Predictive Marker for Colorectal Cancer

## SUPPLEMENTARY MATERIALS

**Table S1.** Clinical parameters of 26 paired patients with CRC whose tissues were analyzed with Illumina Infinium HumanMethylation450 BeadChip array assays.

| Characteristics                       | Total<br>n(%) |
|---------------------------------------|---------------|
| <b>Total</b>                          | 26            |
| <b>Clinicopathological parameters</b> |               |
| <b>Age</b>                            |               |
| < 60                                  | 8 (30.8)      |
| > 60                                  | 18 (69.2)     |
| <b>Gender</b>                         |               |
| Male                                  | 18 (69.2)     |
| Female                                | 8 (30.8)      |
| <b>Tumor type</b>                     |               |
| Adeno                                 | 21 (84.0)     |
| Mucinous                              | 1 (4.0)       |
| Others                                | 3 (12.0)      |
| <b>Tumor stage</b>                    |               |
| Early (stage I and II)                | 16 (61.5)     |
| Late (stage III and IV)               | 10 (38.5)     |
| <b>Primary tumor</b>                  |               |
| Submucosa                             | 1 (3.8)       |
| Muscularis propria                    | 5 (19.2)      |
| Subserosa                             | 17 (65.4)     |
| Penetrate the visceral                | 3 (11.5)      |
| <b>Regional lymph nodes</b>           |               |
| No regional lymph node metastasis     | 17 (65.4)     |
| Metastasis in regional lymph nodes    | 9 (34.6)      |
| <b>Distant metastasis</b>             |               |
| No distant metastasis                 | 24 (92.3)     |
| Distant metastasis                    | 2 (7.7)       |
| <b>Differentiation grade</b>          |               |
| Well                                  | 3 (11.5)      |
| Moderate                              | 18 (69.2)     |
| Poor                                  | 5 (19.2)      |
| <b>Location</b>                       |               |
| Colon                                 | 20 (76.9)     |
| Rectal                                | 6 (23.1)      |

**Table S2.** Cox proportional-hazards survival analysis in Western patients with CRC.

| Variable.               | Multivariate Analysis <sup>a</sup> |               |         |
|-------------------------|------------------------------------|---------------|---------|
|                         | HR                                 | 95%CI         | p-value |
| <b>Overall Survival</b> |                                    |               |         |
| Age                     | 1.140                              | 0.650 – 2.000 | 0.649   |
| Location                | 1.324                              | 0.694 – 2.527 | 0.395   |

|                                  |        |                 |         |
|----------------------------------|--------|-----------------|---------|
| Tumor size                       | 2.607  | 0.785 – 8.655   | 0.118   |
| Metastasis                       | 1.000  | 0.478 – 2.092   | 1.000   |
| Lymph invasion                   | 2.396  | 1.311 – 4.279   | 0.005** |
| <i>EHD3</i> DNA methylation      | 1.963  | 1.036 – 3.719   | 0.039*  |
| <i>EHD3</i> RNA expression       | 1.579  | 0.863 – 2.890   | 0.138   |
| <b>Recurrence-free survival</b>  |        |                 |         |
| Age                              | 1.037  | 0.475 – 2.264   | 0.927   |
| Location                         | 1.737  | 0.680 – 4.438   | 0.248   |
| Tumor size                       | 2.008  | 0.448 – 8.999   | 0.362   |
| Metastasis                       | 1.137  | 0.448 – 2.899   | 0.787   |
| Lymph invasion                   | 3.485  | 1.552 – 7.821   | 0.002** |
| <i>EHD3</i> DNA methylation      | 2.180  | 0.191 – 1.033   | 0.059   |
| <i>EHD3</i> RNA expression       | 0.444  | 0.923 – 5.152   | 0.076   |
| <b>Progression-free survival</b> |        |                 |         |
| Age                              | 0.889  | 0.246 – 3.213   | 0.858   |
| Location                         | 7.514  | 0.736 – 76.725  | 0.089   |
| Tumor size                       | 0.448  | 0.074 – 2.703   | 0.381   |
| Metastasis                       | 16.494 | 2.149 – 126.620 | 0.007** |
| Lymph invasion                   | 0.451  | 0.050 – 4.059   | 0.477   |
| <i>EHD3</i> DNA methylation      | 6.026  | 0.666 – 54.489  | 0.110   |
| <i>EHD3</i> RNA expression       | 0.287  | 0.058 – 1.420   | 0.126   |

\* $p < 0.05$ ; \*\* $p < 0.01$ ; \*\*\* $p < 0.001$ .

a. For multivariate Cox proportional-hazards survival analysis, the data were adjusted for age, differentiation, sex, tumor stage, and location.

b. *EHD3* methylation levels were derived from CRC tumors in the TCGA dataset.

**Table S3.** List of primer sequences and reaction conditions used in the study.

| Real-Time RT-PCR |         | Sequence (5' to 3')            | Probe | Tm (°C) |
|------------------|---------|--------------------------------|-------|---------|
| <i>EHD3</i>      | Forward | GGGACTTCCCCAATCTGAAG           | #67   | 60      |
|                  | Reverse | GCCAGCATGTCGTCCACT             |       |         |
| <i>GAPDH</i>     | Forward | AGCCACATCGCTCAGACAC            | #60   | 60      |
|                  | Reverse | GCCCAATACGACCAAATCC            |       |         |
| QMSP             |         |                                |       |         |
| <i>EHD3</i>      | Forward | CGTCGTCGTTTTTTTTTGAGTC         |       | 60      |
|                  | Reverse | TACAAAAAACTACCAAATACCGAA       |       |         |
|                  | probe   | TACTTCGACTCCGCTCCTACCGAACC     |       |         |
| <i>ACTB</i>      | Forward | TGGTGATGGAGGAGGTTTAGTAAGT      |       | 60      |
|                  | Reverse | AACCAATAAAACCTACTCCTCCCTTAA    |       |         |
|                  | probe   | ACCACCACCCAACACACAATAACAAACACA |       |         |

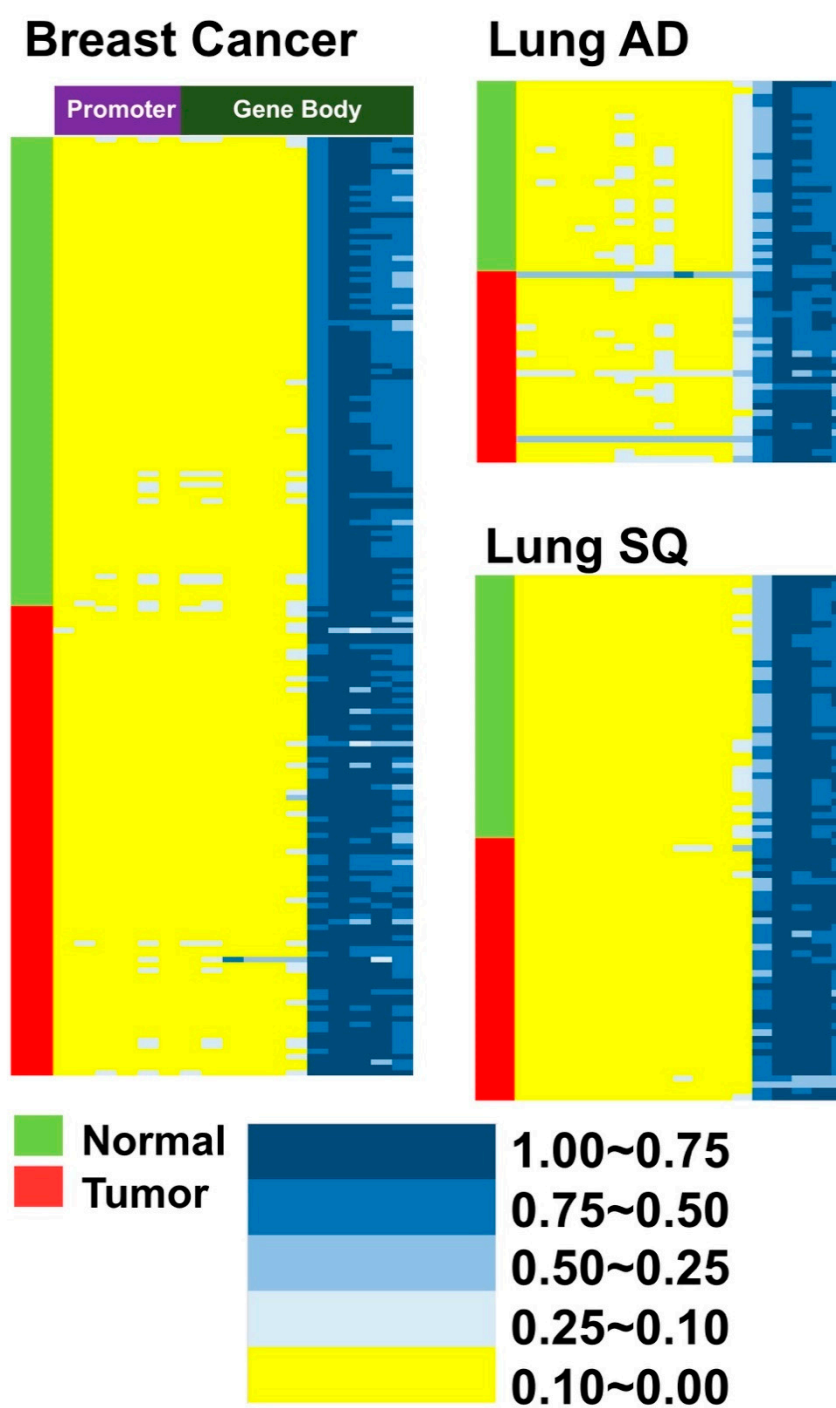

**Figure S1.** Methylation heatmap of *EHD3* in paired breast cancer, lung adenocarcinoma, and squamous cell lung cancer tissues.

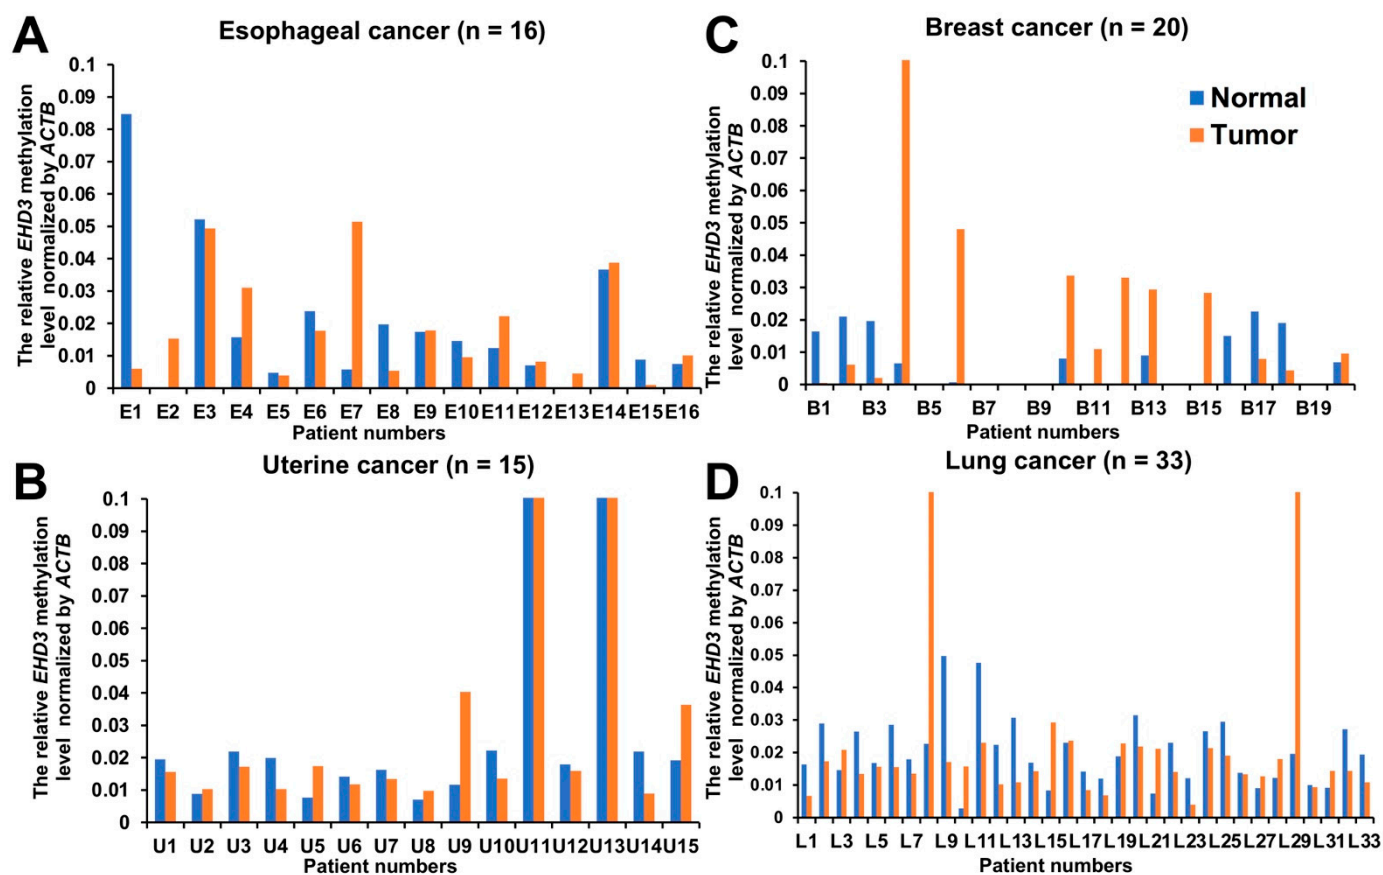

**Figure S2.** Bar graph of the promoter hypermethylation of the *EHD3* pattern in paired (A) esophageal, (B) uterine, (C) breast, and (D) lung cancer tissues compared with matched normal tissue in the Taiwanese cohort.

**A**

GTAGGGTAGAGTAGGCGAGGGTTGGGGGTCGATCGGGGATTTCCGGTATTTGG

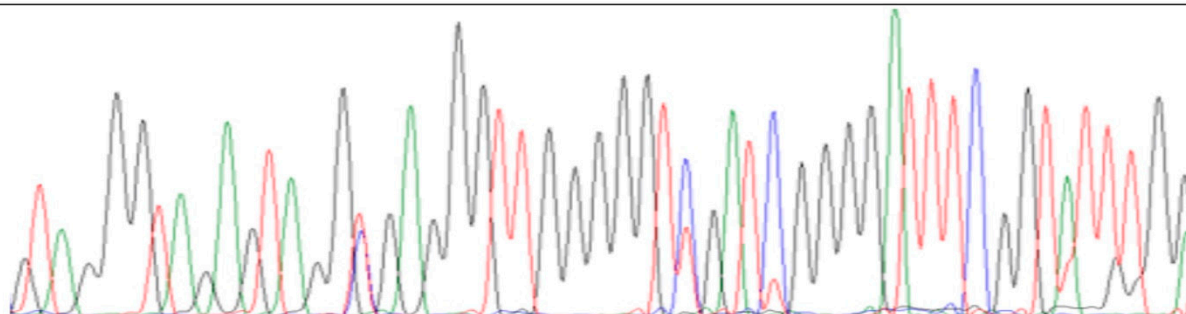**B**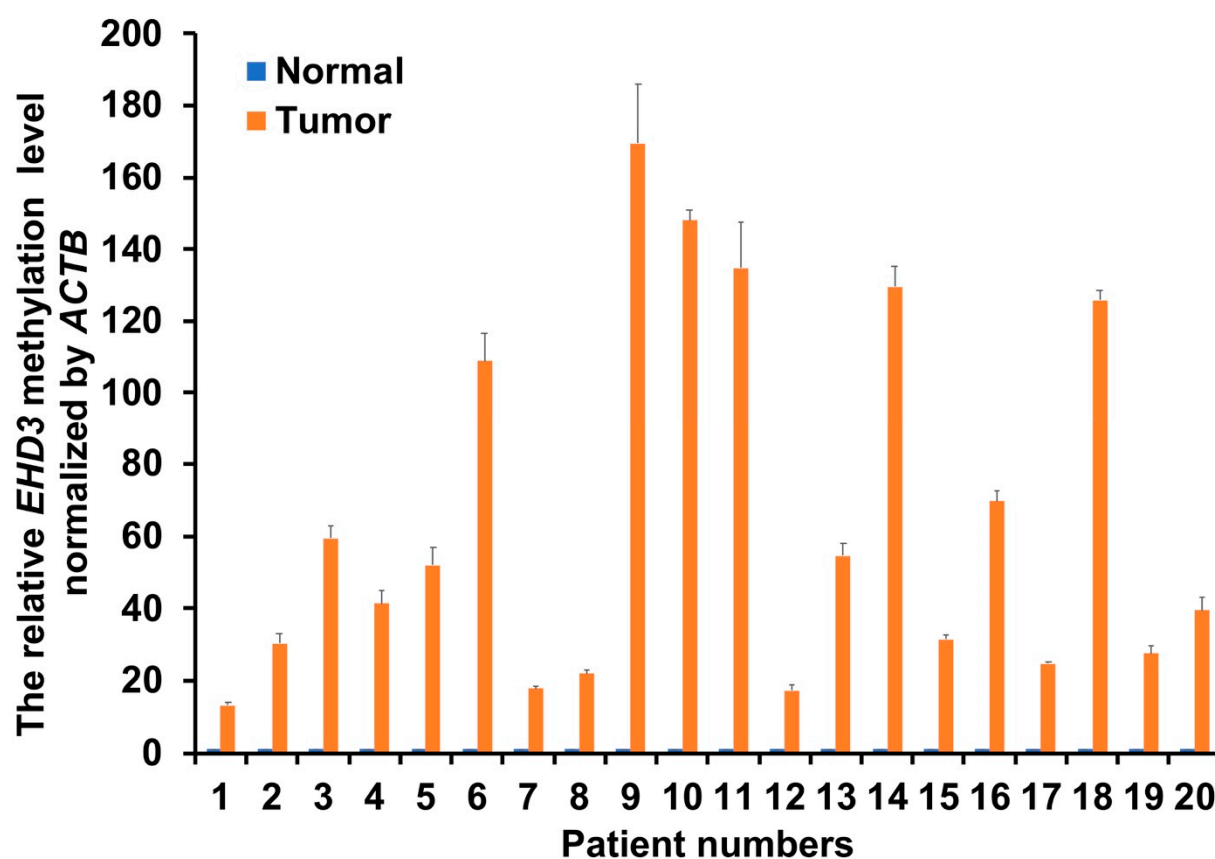

**Figure S3.** Hypermethylation of the *EHD3* promoter gene was analyzed in patients with CRC. (A) Bisulfite sequencing was performed to verify the specificity of the *EHD3* QMSP assay. (B) Representative figure of *EHD3* methylation determined through QMSP assay in 20 patients with CRC. Data are presented as means  $\pm$  standard deviations. Experiments were performed with at least three technical replicates.

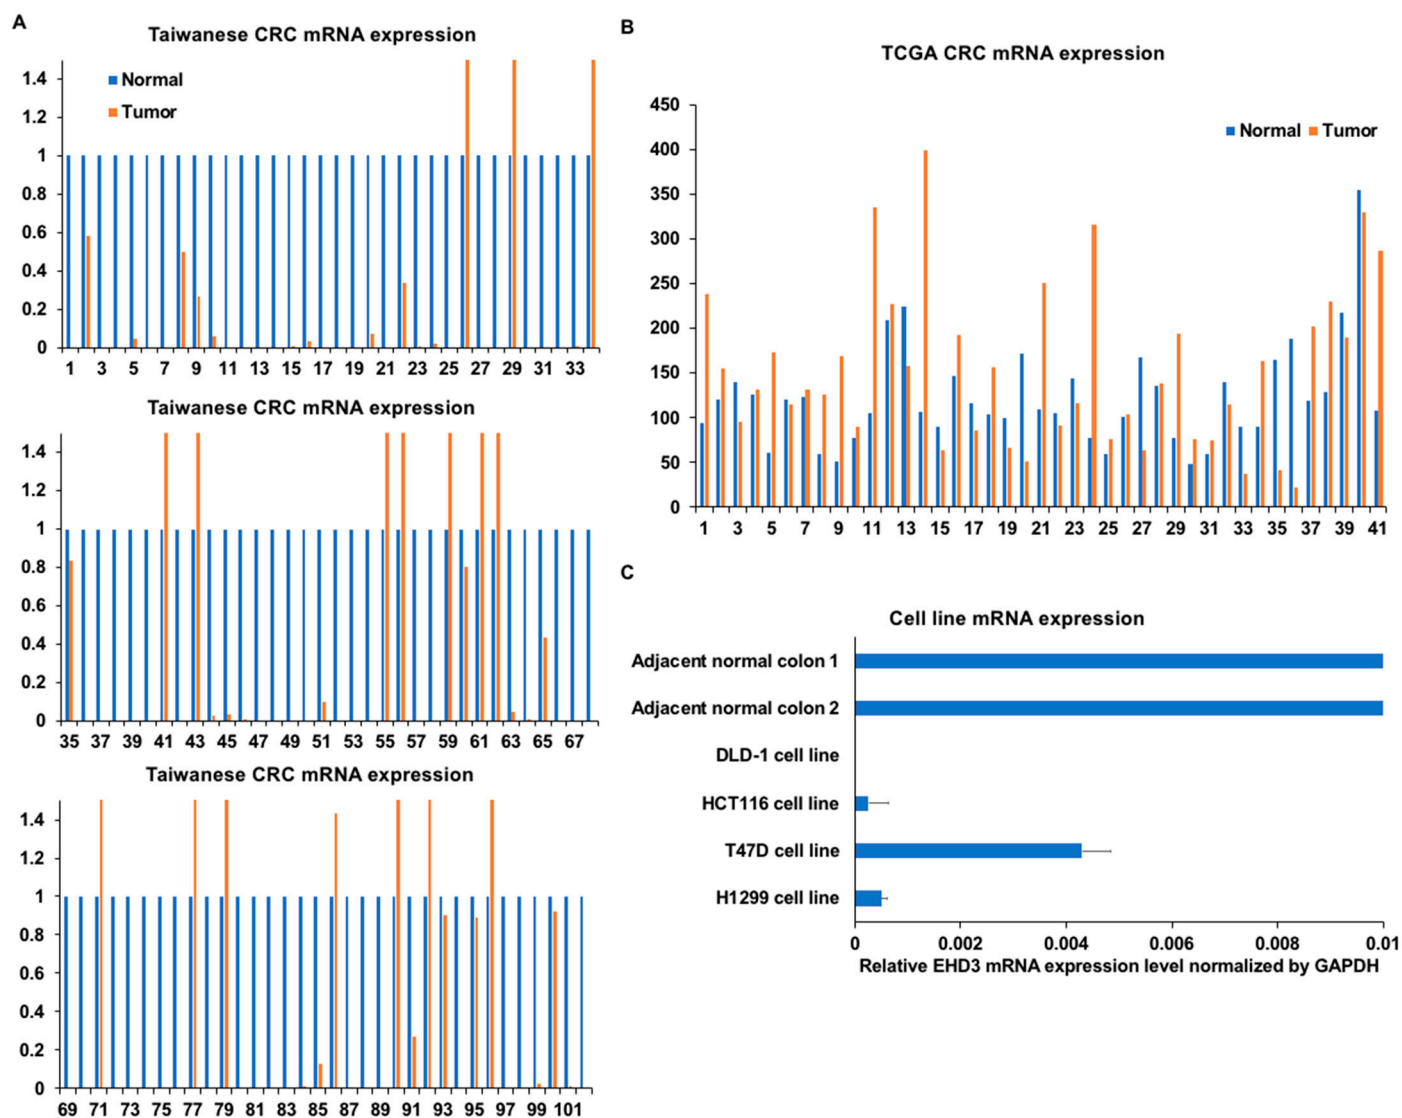

**Figure S4.** *EHD3* mRNA expression levels were analyzed in CRC tumors and paired normal colorectal tissues. (A) *EHD3* mRNA expression levels were analyzed using real-time RT-PCR in 102 Taiwanese patients. (B) *EHD3* mRNA expression levels were analyzed with the RNA sequencing of paired tissues from normal controls and 41 paired patients with CRC from the TCGA. (C) *EHD3* mRNA expression levels were analyzed in two adjacent normal colon tissues, two colon cancer cell lines (DLD-1 and HCT116), one breast cancer cell line (T47D), and one lung cancer cell line (H1299).
